# Supplementary material for: Facile preparation of 2D Bi2MoO6 nanosheets–RGO composites with enhanced photocatalytic activity
Source: Royal Society of Chemistry journal article supplement (doi:10.1039/c7nj01712j), 2017-01-01
Supplement: c7nj01712j1.pdf [file c7nj01712j1.pdf]

## Supporting Information

### **Facile preparation 2D Bi<sub>2</sub>MoO<sub>6</sub> nanosheets-RGO composites with Enhanced Photocatalytic Activity**

Jinwu Bai, Yun Li, Xuemin Li, Lu Liu

*Tianjin Key Laboratory of Environmental Remediation and Pollution Control,  
Nankai University, Tianjin 300071, China.*

**KEYWORDS:** Bi<sub>2</sub>MoO<sub>6</sub> nanosheets, graphene, ciprofloxacin (CIP), photocatalyst.

\* Corresponding author. E-mail: liul@nankai.edu.cn

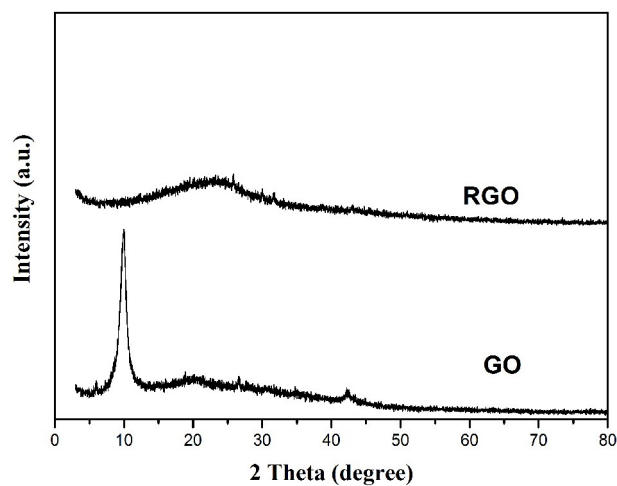

**Figure S1.** XRD pattern of GO and RGO

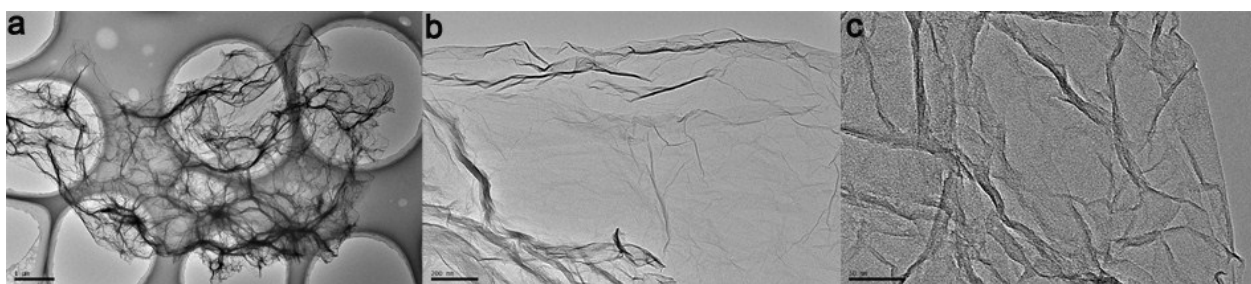

**Figure S2.** TEM images (a, b, c) of the RGO

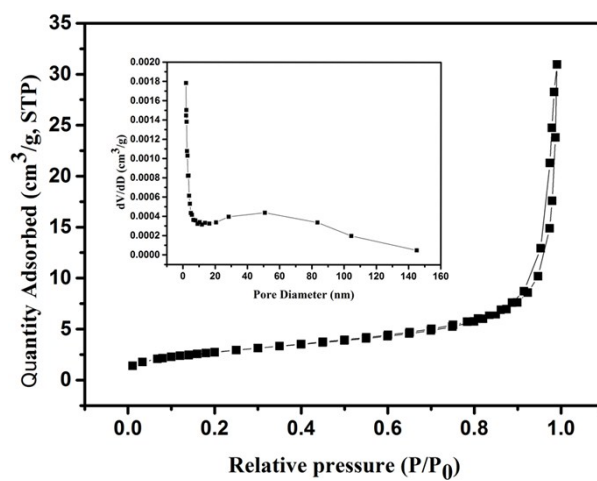

**Fig. S3.** Nitrogen adsorption-desorption isotherms and the corresponding pore size distribution plot (inset) of  $\text{Bi}_2\text{MoO}_6$  nanosheets.

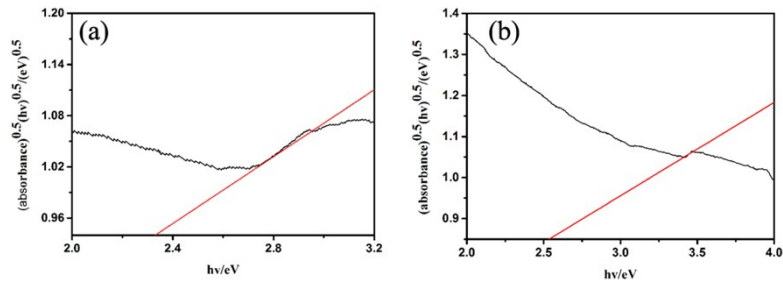

**Fig. S4.** The  $(Ah\nu)^{1/2}$ - $h\nu$  curves of (a)  $\text{Bi}_2\text{MoO}_6$  nanosheets and (b)  $\text{Bi}_2\text{MoO}_6$ -RGO composites.

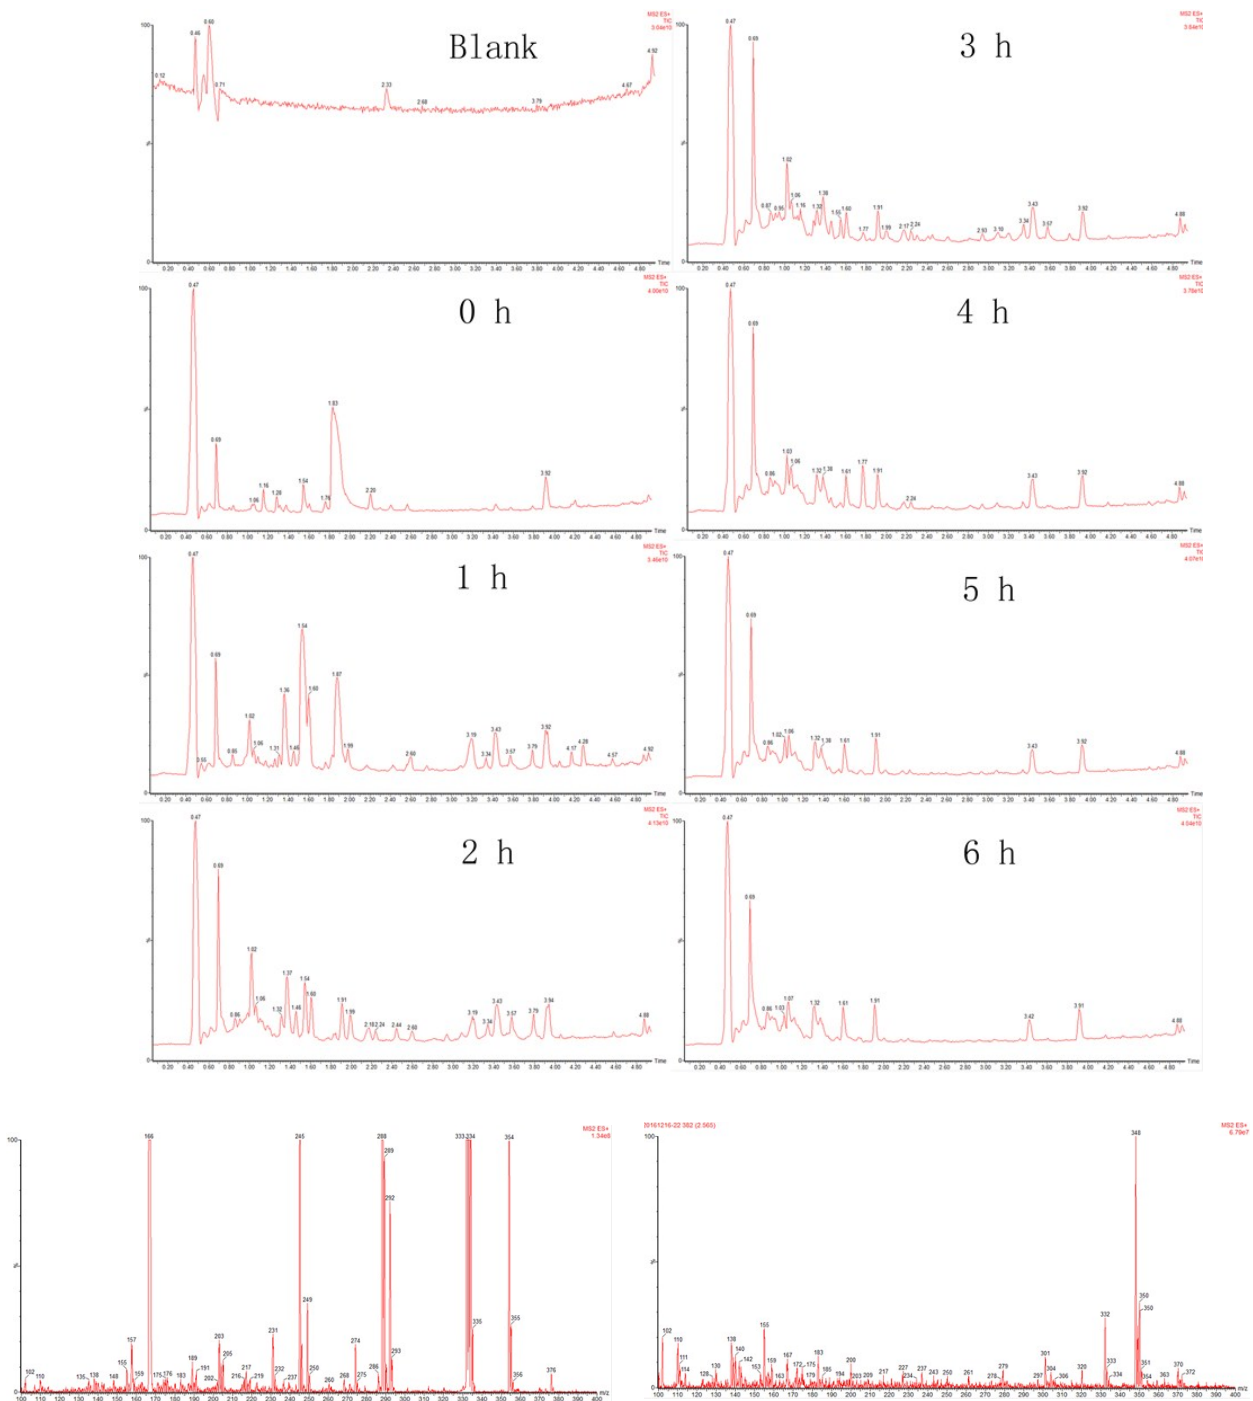

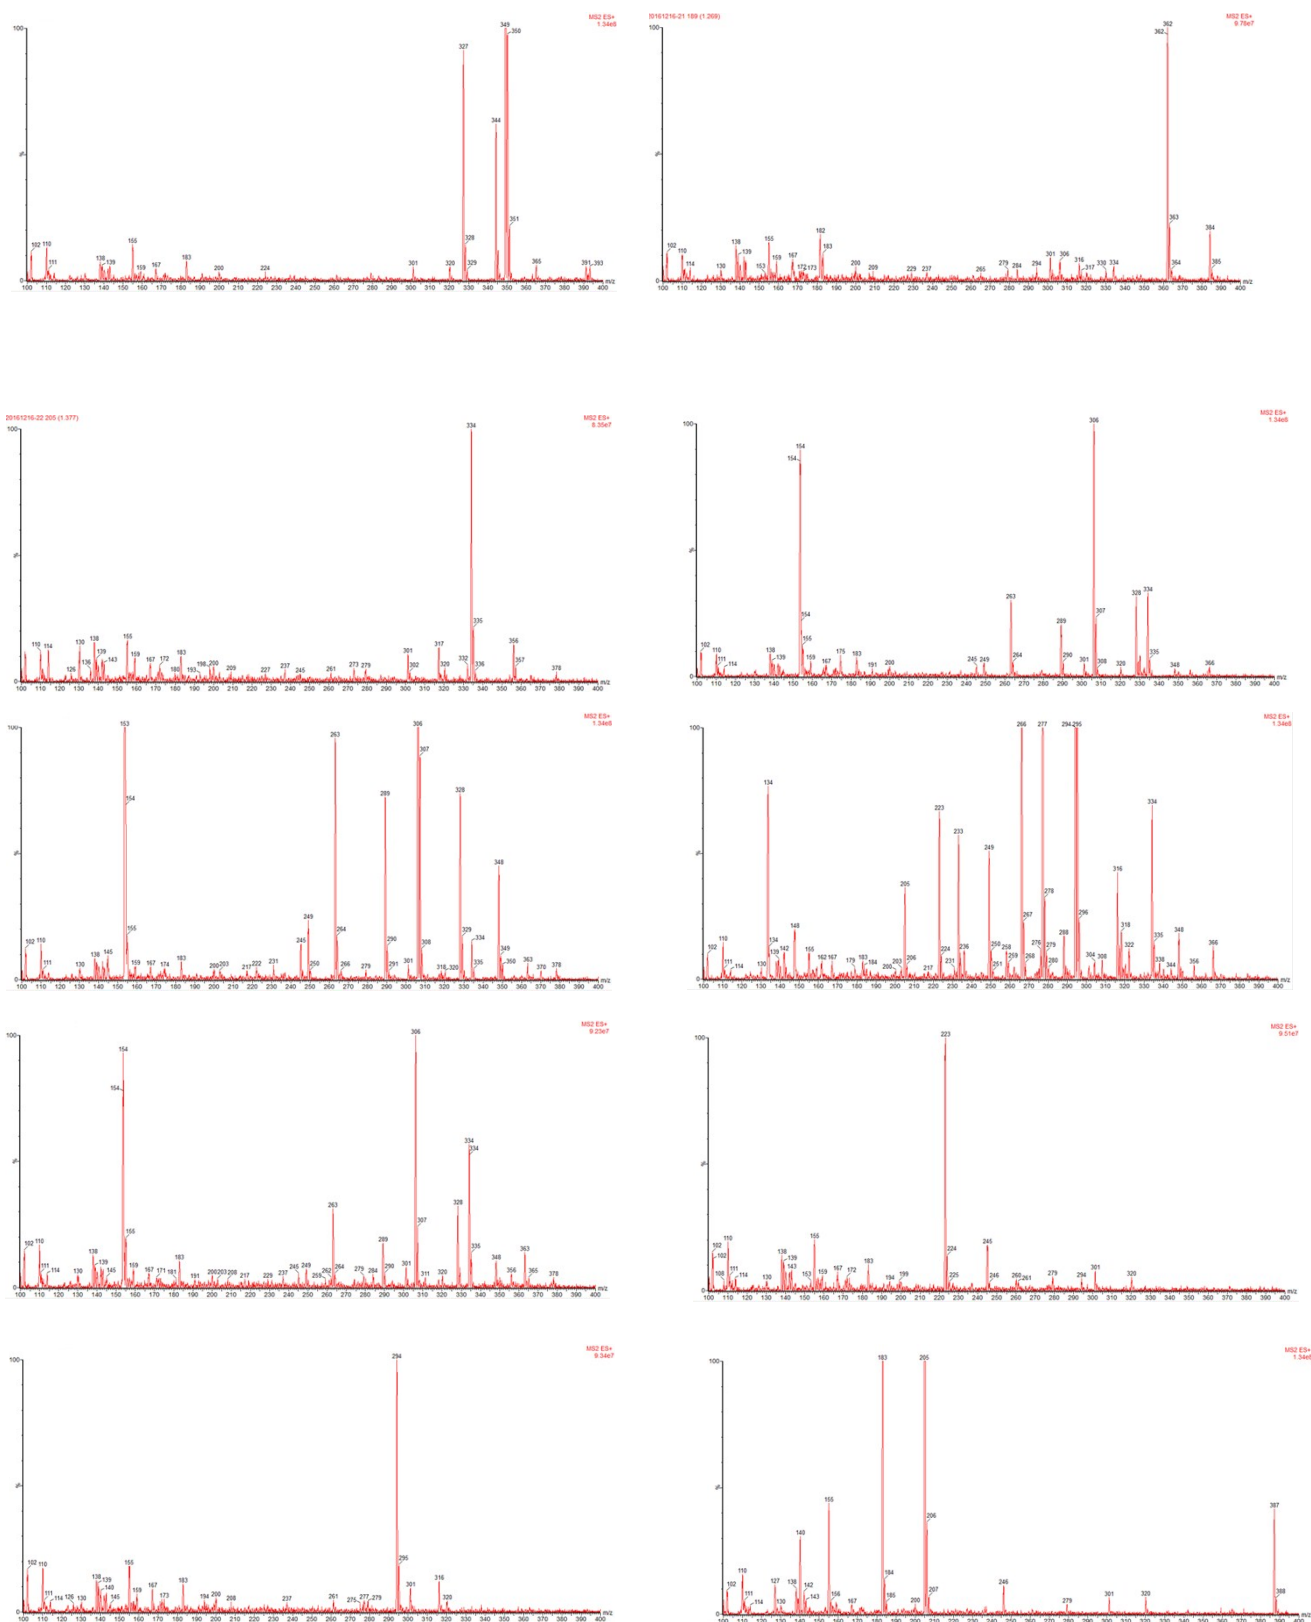

**Figure S5.** Ultra performance liquid chromatography mass spectrometry (UPLC-MS) chromatogram for CIP over  $\text{Bi}_2\text{MoO}_6$ -RGO composites after UV irradiation.
